# Supplementary material for: Single-ion magnet behaviour in [U(TpMe2)2I]
Source: Royal Society of Chemistry journal article supplement (doi:10.1039/c2dt31421e), 2012-01-01
Supplement: c2dt31421e.pdf [file c2dt31421e.pdf]

## EXPERIMENTAL

**General Preparative Procedures.** All manipulations were carried out using vacuum line techniques and a purified nitrogen-filled glove box. THF and *n*-hexane were pre-dried using 4 Å molecular sieves, freshly distilled from sodium-benzophenone under an atmosphere of N<sub>2</sub> and degassed with freeze pump-thaw cycles. Benzene-*d*<sub>6</sub> was pre-dried over Na and distilled from sodium-benzophenone under an atmosphere of Ar. <sup>1</sup>H NMR spectra were recorded at 296 K on a Varian INOVA-300 spectrometer operating at 300 MHz and referenced internally to the residual proton solvent resonances relative to tetramethylsilane (benzene-*d*<sub>6</sub>, δ 7.16 ppm). CHN elemental analyses were performed in-house using an EA110 CE Instruments automatic analyzer.

**Synthesis of [U(Tp<sup>Me2</sup>)<sub>2</sub>I] (1).** Compound **1** was prepared according to the method previously reported by Takats and coworkers [1] and crystallized by slow evaporation of a THF solution. The crystals were washing with *n*-hexane and vacuum dried. The formulation and purity of the compound were checked by <sup>1</sup>H NMR spectroscopy and CHN elemental analysis. Data are in agreement with those previously reported. Found: C, 37.5; H, 5.0; N, 17.7. C<sub>30</sub>H<sub>44</sub>B<sub>2</sub>IN<sub>12</sub>U requires C, 37.7; H, 4.6; N, 17.5 %. δ<sub>H</sub> (300.1 MHz; C<sub>6</sub>D<sub>6</sub>; Me<sub>4</sub>Si; 296 K): 7.40 (6H, s, 4-*H* of Tp<sup>Me2</sup>), 0.27 (18H, s, CH<sub>3</sub> of Tp<sup>Me2</sup>), -11.66 (18H, s, CH<sub>3</sub> of Tp<sup>Me2</sup>).

**Magnetic measurements.** Magnetic measurements were performed in polycrystalline powder samples imbedded in hexane and sealed in a 4 mm inner diameter quartz tube. Measurements of **1** were taken using a 6.5 T S700X SQUID magnetometer (Cryogenic Ltd.) in the temperature range 1.8-300 K under several applied magnetic fields from 100 G to 1 kG. For compound **2**, a <sup>3</sup>He insert adapted to the SQUID magnetometer was used to measure below 2 K both temperature dependent and field dependent magnetization curves at fixed temperatures. Above 1.8 K field dependent magnetization up to 5 T at different temperatures and AC susceptibility measurements in **1** were taken using a MagLab 2000 system (Oxford Instruments). The paramagnetic data was obtained after a correction for the core diamagnetism estimated, using Pascal's constants, as χ<sub>D</sub> = -753.6 × 10<sup>-6</sup> and -811.4 × 10<sup>-6</sup> emu/mol for **1** and **2** respectively. Temperature dependence of AC magnetic susceptibility was measured using a 5 Oe oscillating field in the 30-10000 Hz frequency

range under zero and 500 Oe static fields. Additional isothermal AC susceptibility measurements,  $\chi_{AC} = f(\omega)$ , were taken in the 10-10000 Hz frequency range, within 1.7 and 6 K, the temperature range in which the relaxation time reaches a maximum. Cole-Cole plots were fitted using a generalized Debye model [2],

$$\chi(\omega) = \chi_S + (\chi_T + \chi_S) / (1 + i\omega\tau)^{1-\alpha}$$

which describes both real and imaginary components of AC susceptibility,  $\chi'$  and  $\chi''$  in terms of frequency, isothermal susceptibility ( $\chi_T$ ), adiabatic susceptibility ( $\chi_S$ ), relaxation time ( $\tau$ ), and a variable representing the distribution of relaxation times ( $\alpha$ ).

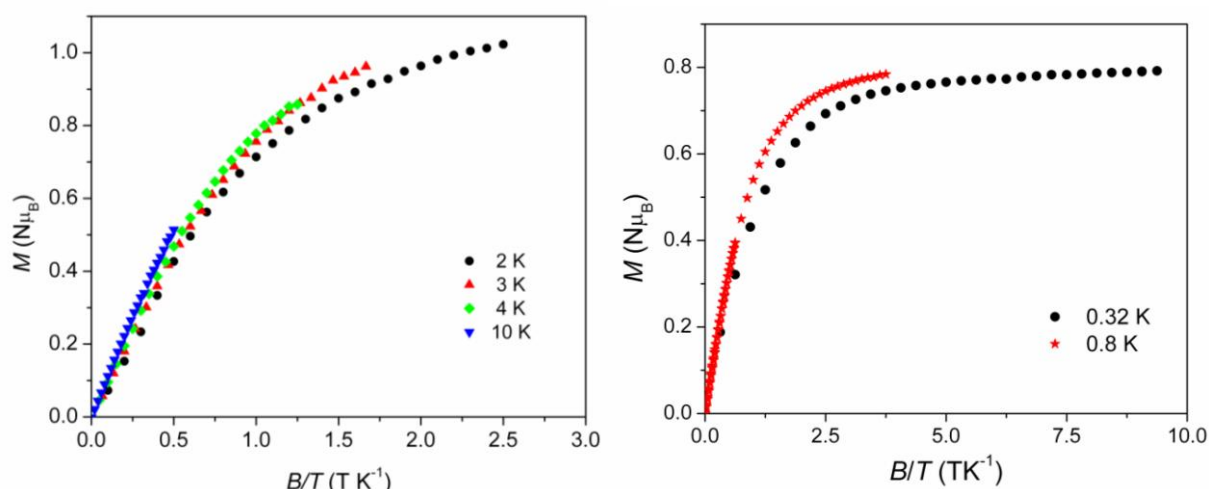

Figure S11. Reduced magnetisation plots ( $M$  vs.  $B/T$ ) for **1** (left) and **2** (right).

**Quantum Chemistry Calculations.** The excited states of the complexes have been calculated with the SO-CASPT2 method using the MOLCAS76 suite of programs [3]. A ANO-RCC basis sets of TZP and DZ qualities were used for the Uranium and the other atoms respectively. The active space consists of 3 electrons in the 7 5f orbitals. First, a CASSCF (Complete Active Space Self Consistent Field) calculation was performed [4], then dynamical correlation was included by the CASPT2 (Complete Active Space Perturbation Theory at the 2<sup>nd</sup> order) method [5] and finally, the spin-orbit coupling was evaluated by a state interaction between the CASPT2 wave functions by the RASSI (Restricted Active Space

State Interaction) method [6]. g factors were calculated according to reference [7]. Expectation values of J are calculated by diagonalizing the matrix of the  $\vec{L} + \vec{S}$  operator in the 10 first states (since there is a large energy gap between the 10<sup>th</sup> and 11<sup>th</sup> states).

## References:

- [1] Y. Sun, R. McDonald, J. Takats, V. W. Day and T. A. Eberspacher, *Inorg. Chem.*, 1994, **33**, 4433.
- [2] (a) K. S. Cole and R. H. Cole, *J. Chem. Phys.* 1941, **9**, 341; (b) S. M. J Aubin, Z. Sun, L. Pardi, J.Krzystek, K. Folting, L. C.Brunel, A. L.Rheingold, G. Christou, and D. N. Hendrickson, *Inorg. Chem.* 1999, **38**, 5329.
- [3] F. Aquilante, L. De Vico, N. Ferré, G. Ghigo, P. Å Malmqvist, P. Neogrády, T. B. Pedersen, M. Pitonak, M. Reiher, B. O. Roos, L. Serrano-Andrés, M. Urban, V. Veryazov, R. Lindh, *J. Comp. Chem.*, 2010, **31**, 224.
- [4] B. O Roos, P. R. Taylor, and P. E. M. Siegbahn, *Chem. Phys.*, 1980, 157.
- [5] K. Andersson, P. Å. Malmqvist, B. O. Roos, A. J. Sadlej, and K. Wolinski, *J. Phys. Chem.*, 1990, 5483.
- [6] P. Å. Malmqvist, B. O. Roos, and B. Schimmelpfennig, *Chem. Phys. Lett.* 2002, **357**, 230.
- [7] H. Bolvin ChemPhysChem. 2006, **7**, 1575.

**Table S1.** Experimental effective energy barriers,  $E_{\text{eff}}$ , and blocking temperatures,  $T_b$ , and calculated (CASPT2) energy gaps,  $\Delta E$ , g-values, angles between the principal magnetic axes of the ground state and the first excited state,  $\theta$  and expectation values of J, L, S, for mononuclear U compounds.

| Compound                                              | $E_{\text{eff}}/\text{cm}^{-1}$ | $T_b/\text{K}$ | $\Delta E/\text{cm}^{-1}$ | $g_1$ | $g_2$ | $g_3$ | $\theta$ | J   | L   | S   |
|-------------------------------------------------------|---------------------------------|----------------|---------------------------|-------|-------|-------|----------|-----|-----|-----|
| <b>1</b>                                              | 21.0                            | 3.5            | 146                       | 4.9   | 1.1   | 0.5   | 77       | 4.3 | 5.4 | 1.1 |
| <b>2</b>                                              | 18.2                            | 4.5            | 138                       | 3.4   | 1.3   | 0.7   | 65       | 4.2 | 5.5 | 1.3 |
| [U(H <sub>2</sub> Bpz <sub>2</sub> ) <sub>3</sub> ] * | 8.                              | ~3             | 28                        | 5.1   | 1.0   | 0.4   | 56       | 4.2 | 5.4 | 1.1 |

\* J. D. Rinehart, K. R. Meihaus, and J. R. Long, *J. Am. Chem. Soc.*, 2010, **132**, 7572.
